# Supplementary material for: Development of Antibiotic Resistance during Simulated Treatment of Pseudomonas aeruginosa in Chemostats
Source: PLoS One. 2016 Feb 12;11(2):e0149310. doi: 10.1371/journal.pone.0149310 (PMC4752458; doi:10.1371/journal.pone.0149310)
Supplement: S1 File — (XLSX) [file pone.0149310.s001.xlsx]

## Sheet: Figure 2 &4-raw data
Time (days)	Ceftazidime										Meropenem
	Cell number (CFU/ml)					MIC (mg/l) to Ceftazidime					Cell number (CFU/ml)			MIC (mg/l) to Ceftazidime
	0.05	50% I	50% II	95% I	95% II	0.05	50% I	50% II	95% I	95% II	0.05	50% I	95% I	0.05	50% I	95% I	95% II
D0	670000000	740000000	2000000000	1000000000	1500000000	8	8	8	8	8	500000000	200000000	450000000	0.5	0.5	0.5
D1	8500000	2010000	7000000	5000000	23000000	16	32	16	8	8	33000000	10000000	2500000	1	1	0.5
D2	210000000	600000	1500000	2000000	2700000	64	128	64	16	16	30000000	2000000	1000000	2	4	0.5
D3	190000000	300000000	150000000	350000	700000	128	256	256	128	64	90000000	25000000	1000000	4	8	1
D4	100000000	300000000	800000000	250000000	8000000	256	256	512	256	128	85000000	150000000	500000	8	16	1
D5	269000000	1000000000	1500000000	230000000	400000000	256	512	512	512	512	200000000	100000000	100000	8	64	1
D6	290000000	800000000	1000000000	360000000	200000000	256	1024	1024	1024	1024	200000000	400000000	1300000	8	64	8
D7	330000000	1200000000	1500000000	600000000	200000000	256	1024	1024	1024	1024	250000000	400000000	100000000	8	64	64
Time (days)	Cell number (CFU/ml)				MIC (mg/l) to Ceftazidime
	50% I	50% II	95% I	95% II	50% I	50% II	95% I	95% II
D0	740000000	2000000000	1000000000	1500000000	8	8	8	8
D1	2010000	7000000	5000000	23000000	32	16	8	8
D2	600000	1500000	2000000	2700000	128	64	16	16
D3	300000000	150000000	350000	700000	256	256	128	64
D4	300000000	800000000	250000000	8000000	256	512	256	128
D5	1000000000	1500000000	230000000	400000000	512	512	512	512
D6	800000000	1000000000	360000000	200000000	1024	1024	1024	1024
D7	1200000000	1500000000	600000000	200000000	1024	1024	1024	1024

## Sheet: Figure 5 -raw data
		5% CAZ				5% MPN					50% CAZ				50% MPN					95% CAZ				95% MPN
Time		0.05	0.5	0.95		0.05	0.5	0.95			0.05	0.5	0.95		0.05	0.5	0.95			0.05	0.5	0.95		0.05	0.5	0.95
days		8 ug/ml	24 ug/ml	48 ug/ml		0,6 ug/ml	5 ug/ml	10 ug/ml			8 ug/ml	24 ug/ml	48 ug/ml		0,6 ug/ml	5 ug/ml	10 ug/ml			8 ug/ml	24 ug/ml	48 ug/ml		0,6 ug/ml	5 ug/ml	10 ug/ml
0		1e-08	1e-08	1e-08	--	6e-06	1e-08	1e-08	--	--	1e-08	1e-08	1e-08	--	1e-05	1e-08	1e-08	--	--	1e-08	1e-08	1e-08	--	1e-05	1e-08	1e-08
1		0.000521176	4.97512e-06	1e-08	--	0.000136364	1e-08	1e-08	--	--	0.000910448	1e-08	1e-08	--	0.0001	1e-08	1e-08	--	--	1e-08	1e-08	1e-08	--	2e-05	1e-08	1e-08
2		1	0.41667	0.018	--	0.0003	1e-08	1e-08	--	--	0.83333	0.03224	5.13333e-06	--	0.02	1e-08	1e-08	--	--	9.75e-05	1e-08	1e-08	--	0.0002	1e-08	1e-08
3		0.65789	1	0.02	--	0.00167	1e-08	1e-08	--	--	1	0.35211	6e-05	--	0.4	0.16	4e-05	--	--	0.28571	0.42857	0.13143	--	0.16	1e-08	1e-08
4		1	0.76667	0.01333	--	0.03529	0.01765	1e-08	--	--	0.66667	0.448	1.66667e-05	--	0.8	0.66667	0.66667	--	--	1	0.8	1	--	1	1e-08	1e-08
5		0.89963	0.88	0.005	--	0.006	0.01	1e-08	--	--	0.9	0.16617	7.54717e-06	--	1	1	1	--	--	1	1	1	--	1	1e-08	1e-08
6		0.7931	1	0.005	--	0.075	0.075	7.5e-07	--	--	1	0.28759	1.12e-05	--	0.75	1	1	--	--	1	1	1	--	1	0.12	0.2
7		1	0.83333	0.00625	--	0.2	0.08	8e-07	--	--	1	0.21091	1.07143e-05	--	1	1	1	--	--	0.83333	1	1	--	1	1	1
